# Supplementary material
Source: publisher figshare collection journal article supplement (https://gsajournals.figshare.com/ndownloader/files/20183174)
Supplement: Supplementary file 1 [file 20183174]

**Figure S7**


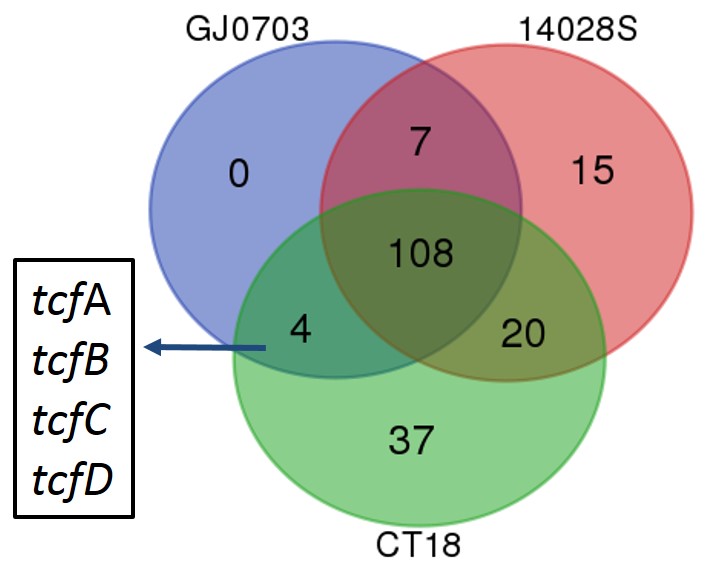


**Distribution of orthologous virulent factors in GJ0703, CT18 and strain 14028S.** The Venn diagram shows the identified virulence factor relationship amongst strains GJ0703, 14028S and CT18. Virulence factors were characterized by using BLASTp against the VFDB database with cut-offs identities >75%. Based on this scenario *tcf*A-D was identified as shared genes for strain CT18 and absent in strain 14028S.
